# Using Permutation Entropy to Measure the Electroencephalographic Effects of Sevoflurane

Xiaoli Li, Ph.D.,\* Suyuan Cui, M.E.,† Logan J. Voss, Ph.D.‡

**Background:** Approximate entropy (AE) has been proposed as a measure of anesthetic drug effect in electroencephalographic data. Recently, a new method called *permutation entropy* (PE) based on symbolic dynamics was also proposed to measure the complexity in an electroencephalographic series. In this study, the AE and PE were applied to electroencephalographic recordings for revealing the effect of sevoflurane on brain activity. The dose-response relation of PE during sevoflurane anesthesia was compared with that of AE.

**Methods:** Nineteen patients' electroencephalographic data were collected during the induction of general anesthesia with sevoflurane. PE and AE were applied to the electroencephalographic recordings, and the performance of both measures was assessed by pharmacokinetic-pharmacodynamic modeling and prediction probability. To ensure an accurate complexity measure of electroencephalographic recordings, a wavelet-based preprocessor was built in advance.

**Results:** Both PE and AE could distinguish between the awake and anesthetized states and were highly correlated to each other ( $r = 0.8$ ,  $P = 0.004$ ). The pharmacokinetic-pharmacodynamic model adequately described the dose-response relation between PE and AE and sevoflurane effect site concentration. The coefficient  $R^2$  between PE and effect site concentration was  $0.89 \pm 0.07$  for all patients, compared with  $0.60 \pm 0.14$  for AE. Prediction probabilities of  $0.86 \pm 0.04$  and  $0.79 \pm 0.09$  for PE and AE showed that PE has a stronger ability to differentiate between the awake and anesthetic states.

**Conclusion:** The results show that PE can estimate the sevoflurane drug effect more effectively than AE. This method could be applied to design a new electroencephalographic monitoring system to estimate sevoflurane anesthetic drug effect.

ANALYSIS of the real-time raw electroencephalographic signal can be used to extract a continuous index of anesthetic drug effect on the central nervous system. Several processed electroencephalographic indexes have been developed to quantify anesthetic effect, and their use has resulted in a reduction in anesthetic drug consumption and faster recovery from anesthesia.<sup>1-3</sup> Early attempts used spectral analysis of electroencephalographic recordings, such as the spectral edge frequency<sup>4</sup> and the median frequency.<sup>5</sup> While these methods are used to quantify changes in electroencephalography due to anesthetic drug effect, these indices are sensitive

to artifact, and the dose-response relation is not optimum for all anesthetic drugs. Recently, the Bispectral Index (BIS) and spectral entropy have been used in commercial monitoring systems: the BIS<sup>®</sup> monitor (Aspect Medical Systems, Newton, MA) and Entropy Module (Datex-Ohmeda, Helsinki, Finland), respectively. The bispectral analysis is based on the phase interaction between signals at the different frequency bands<sup>6-8</sup>; the entropy module is based on the Shannon entropy of the power spectrum, also called the spectral entropy, from which two spectral entropy indicators are derived: state entropy (0.8-32 Hz) and response entropy (0.8-47 Hz).<sup>9</sup> The BIS cannot reliably distinguish consciousness from unconsciousness in individual patients.<sup>10</sup>

Population neural activity has been shown to exhibit various nonlinear behaviors.<sup>11</sup> Because spectral entropy is a linear measure, it is not optimum for analyzing electroencephalographic signals with nonlinear behaviors. Methods from the theory of nonlinear dynamics, however, may be appropriate for the analysis of electroencephalographic series.<sup>12</sup> In particular, approximate entropy (AE)<sup>13</sup> can be used to quantify the regularity of electroencephalographic series, which could provide an index to indicate the effect of anesthetic drug during anesthesia.<sup>14</sup> However, the practical application of AE is seriously limited because these methods require long, stationary, and noiseless electroencephalographic data. In particular, AE is limited to the quantification of the complexity of a signal generated by a low-dimensional dynamical system. Recently, a new method, called *permutation entropy* (PE), was proposed as a complexity measure of nonlinear and linear time series,<sup>15</sup> e.g., epileptic electroencephalographic series<sup>16</sup> and anesthetic electroencephalographic series.<sup>17,18</sup>

This study was intended to develop a new method to reveal the anesthesia drug effect by calculating the PE of electroencephalographic recordings. The baseline variability of PE, the ability of PE to differentiate the awake and anesthetic states, and the relation between the dose-response were investigated in comparison with the AE during sevoflurane anesthesia in 19 patients. In addition, pharmacokinetic-pharmacodynamic modeling and prediction probability were used to evaluate and compare the predictive performance of PE and AE to separate the anesthetized from the awake state.

## Materials and Methods

### Subjects and Data Acquisition

Test subjects included 19 patients (aged 18-63 yr) with American Society of Anesthesiologists physical sta-

\* Professor and Chairman of Automation, † Research Assistant, Institute of Electrical Engineering, Yanshan University. ‡ Research Fellow, Department of Anesthesia, Waikato Hospital, Hamilton, New Zealand.

Received from the Institute of Electrical Engineering, Yanshan University, Qinhuangdao, Hebei, China. Submitted for publication August 2, 2007. Accepted for publication June 2, 2008. Supported by National Natural Science Foundation of China (60575012), Beijing, China, and the Program for New Century Excellent Talents in University of China, Beijing, China.

Address correspondence to Dr. Li: Department of Automation, Institute of Electrical Engineering, Yanshan University, Qinhuangdao, Hebei 066004, China. xiaoli.avh@gmail.com. Information on purchasing reprints may be found at www.anesthesiology.org or on the masthead page at the beginning of this issue. ANESTHESIOLOGY's articles are made freely accessible to all readers, for personal use only, 6 months from the cover date of the issue.

tus I or II scheduled to undergo elective gynecologic, general, or orthopedic surgery.<sup>19</sup> Patient exclusion criteria were preoperative use of medication acting on the central nervous system; excessive weight or a history of gastroesophageal reflux that would not permit gaseous induction with sevoflurane; a history of cardiac, pulmonary, hepatic, or renal disease; and use of any premedication. All subjects fasted for at least 6 h before anesthesia and received no premedication. All subjects were recruited from Waikato Hospital, Hamilton, New Zealand. Informed consent was obtained from all subjects following Waikato Hospital ethics committee approval.

Before electrode application, the skin was carefully cleaned with an alcohol swab and allowed to dry; the electrode skin impedance was checked to be less than 7.5 k $\Omega$ . A composite electrode composed of a self-adhering flexible band holding three electrodes was used to record the electroencephalography between the forehead and temple. The spectral entropy was measured with a plug-in M-Entropy S/5 Module (Datex-Ohmeda). Response entropy and state entropy were sampled at 0.2 Hz. The sampling rate of electroencephalographic data was 100/s. Inspired and expired sevoflurane concentrations were measured at the mouth and sampled at 100/s. The data were recorded on a laptop computer and stored for later off-line analysis using MatLab (version 7; MathWorks, Natick, MA) computational and data analysis software.

#### *Anesthetic Protocol*

All of the patients were connected to a closed anesthesia breathing circuit *via* a facemask, and fresh gas flow was set at 4 l/min. The patients were preoxygenated to the satisfaction of the anesthetist in charge. Then, sevoflurane was delivered by vaporizer at 3% inspired for 2 min, followed immediately by 7% inspired concentration. State entropy and response entropy were recorded for comparison with awake values. The time at which response entropy decreased to 20 or less was noted, and 7% sevoflurane was continued for a further 2 min. The sevoflurane was then turned off until the response entropy returned to a value of 70 (lightening). All data in the current study are based on this single deepening and lightening protocol. No attempt was made to rouse the subjects, and no supplemental medications were administered. Loss of consciousness (LOC) was assessed by loss of response to verbal command. This data set has been used previously to model the pharmacokinetic-pharmacodynamic effects of sevoflurane by using the spectral entropy of the electroencephalographic signals.<sup>19</sup>

#### *Artifact Filtering*

Several methods based on frequency band, modeling, and time-scale transform have been proposed to remove or reduce the artifacts in scalp electroencephalographic

recordings. In this study, a filter based on wavelet transform was designed to preprocess artifacts embedded in the electroencephalographic recordings.<sup>20</sup> The wavelet-based de-noising method is composed of three steps<sup>21</sup>: (1) the wavelet transform of a signal  $x(t)$ , (2) thresholding the wavelet coefficients, and (3) the inverse wavelet transform to obtain the de-noised signal. Each step is described briefly below.

1. In this study, we used a six-level discrete wavelet transform, using a Sym8 wavelet, which was applied to electroencephalographic data epochs 10 s in length. Previous work has shown that the Sym8 better approximates the electroencephalographic waveform, resulting in preservation of the electroencephalographic waveform after application of the filter.<sup>22</sup>
2. Optimum threshold selection is core to the success of the wavelet-based de-noising method. Several algorithms have been proposed to estimate the threshold for wavelet coefficient-based noise removal, such as data-adaptive wavelet thresholding, block thresholding, and bayesian methods.<sup>21</sup> In this study, we used bayesian block thresholding because previous work has shown that this approach outperforms the classic data-adaptive method.<sup>23</sup> In the bayesian approach, a distribution is calculated based on the wavelet coefficients, which captures the sparseness of wavelet expansions. A suitable bayesian rule is then applied to estimate posterior distribution of the wavelet coefficients.<sup>23</sup> The criteria of the thresholds depend on the bayesian formalism and assumed prior distribution, the details of which have been described previously.<sup>22,24-26</sup>
3. After filtering using the bayesian estimation method described in step 2, the retained information, above thresholds, was used to reconstruct a new electroencephalographic series *via* an inverse discrete wavelet transform. The electroencephalographic data in the frequency bands of approximately 25-50, 12-25, 6-12, 3-6, 1.5-3, and 0.5-1.5 Hz were obtained. The slow frequency band of 0-3 Hz was removed in this study because artifacts derived from electrical activity of the heart, muscles, and eyes often lie at this frequency band (BIS VISTA<sup>27</sup> (p458)). The electroencephalographic data in the frequency band over 25 Hz often includes a large amount of electromyographic artifact<sup>28</sup> and was also discarded before further analysis. Therefore, the electroencephalographic data within the 3- to 25-Hz band was used to calculate the AE and PE values in the following sections.

#### *Approximate Entropy*

Considering the chaotic and nonstationary nature of electroencephalographic data, AE<sup>29</sup> has been applied instead of spectral entropy<sup>30</sup> to measure the predictabil-

ity of electroencephalographic series. AE is based on the similarity of events in phase space and is a favorable method to address randomness of a dynamical system.<sup>14</sup> The predictability of subsequent amplitude values of the electroencephalographic signals can be quantified based on the knowledge of the previous amplitude values. If the electroencephalographic series is regular, the position of a particular point can be predicted by using its previous points, whereas in an irregular electroencephalographic series, the position of the point cannot be easily predicted. It was demonstrated that AE of electroencephalographic recordings could be used to quantify the effect of anesthesia drugs on the brain activity better than other descriptors.<sup>14</sup> The number of previous (lagged) points used in making the prediction is the embedding dimension ( $m$ ). The AE looks at sequences of length  $m$  and then establishes the negative logarithmic probability that these sequences predict a new sequence of  $m + 1$  points to within an error range of  $r$ , typically set at  $0.2 \times \text{SD}$ . For a regular signal, most sequences can successfully predict the next data points; therefore, the AE is low. In turn, for an irregular signal, there are few successful predictions, so the AE is correspondingly high. The exact value of the AE ( $m, r, N$ ) depends on the values chosen for the three parameters of the statistic:  $N$  (number of samples),  $m$  (embedding dimension), and  $r$  (noise threshold).<sup>31</sup> In this study,  $N = 1,000$  points,  $r = 0.2 \times \text{SD}$ , and  $m = 2$  were selected in the light of previous work.<sup>14</sup>

### Permutation Entropy

Ordinal time series analysis is a new method to describe the characteristics embedded in a complex time series. This method transforms a given time series into a series of ordinal patterns each describing the order relations between the present and a fixed number of equidistant past values at a given time.<sup>32</sup> Given a scalar time series  $x_t$  ( $t = 1, 2, \dots$ ), an embedding procedure forms vectors  $X_t [x_t, x_{t+\tau}, \dots, x_{t+m\tau}]$  with the embedding dimension,  $m$ , and the lag,  $\tau$ . Then,  $X_t$  can be arranged in an increasing order. For  $m$  different numbers, there will be  $m!$  possible order patterns, which are also called permutations.<sup>15</sup> To quantify and visualize the changes in time series, Bandt and Pompe<sup>15</sup> have proposed PE based on the Shannon entropy. Considering each permutation as a symbol, the vectors  $X_t$  can be represented by a symbol sequence; the distinct number of symbols ( $J$ ) should be less than or equal to  $m!$ , namely  $J \leq m!$ . For the time series  $x_t$ , the probability distributions of the distinct symbols are defined as  $p_1, \dots, p_j$ ; the PE of this time series is defined by

$$H_p(m) = - \sum_{j=1}^J p_j \ln p_j \quad (1)$$

The corresponding normalized entropy can be defined as follows:

$$H_p = H_p(m) / \ln(m!) \quad (2)$$

The largest value of  $H_p$  is one, meaning all of permutations have equal probability. The smallest value of  $H_p$  is zero, meaning the time series is very regular. That is, the smaller the value of  $H_p$  is, the more regular the time series is. PE refers to the local order structure of the time series, which can give a quantitative complexity measure for a dynamical time series. Mathematical details of the PE can be found in the references.<sup>15,32-34</sup>

Permutation entropy calculation depends on the selection of time interval  $N$  and embedding dimension  $m$ . Similarly to AE, interval  $N$  was selected as 1,000 points (data length of 10 s in this study). When  $m$  is too small (less than 2), the scheme will not work because there are too few distinct states. Often, for a long electroencephalographic recording, a large value of  $m$  is better. However, this study concentrates on the detection of dynamical changes in the electroencephalographic recording, so too large a value of  $m$  (greater than 10) is inappropriate.<sup>16</sup> In this study, we found that  $m = 6$  was appropriate. The parameter selection of PE is addressed in appendix 1.

### Pharmacokinetic-Pharmacodynamic Modeling

The correlation between anesthetic drug effect index and anesthetic drug concentration provides construct validity for anesthetic drug effect monitoring.<sup>19,35</sup> In this study, we used a standard pharmacokinetic-pharmacodynamic model to describe the relation between sevoflurane concentrations and the electroencephalographic response (measured by the PE and AE). This was done by modeling the movement of sevoflurane from the arterial blood (end-tidal) using the first-order rate constant,  $K_{e0}$ . Briefly, the effect site partial pressure is estimated by a first-order effect site model<sup>19</sup>:

$$dC_{\text{eff}} / dt = K_{e0}(C_{\text{et}} - C_{\text{eff}}), \quad (3)$$

where  $C_{\text{et}}$  is the end-tidal concentration of the drug,  $C_{\text{eff}}$  is the sevoflurane concentration at the effect site, and  $K_{e0}$  is the first-order rate constant for efflux from the effect compartment. The  $C_{\text{eff}}$  is estimated by iteratively running this above model with a series of  $K_{e0}$  steps. For each iteration, a nonlinear inhibitory sigmoid  $E_{\text{max}}$  curve is fitted to the data by the following equation<sup>19</sup>:

$$\text{Effect} = E_{\text{max}} - (E_{\text{max}} - E_{\text{min}}) \times (C_{\text{eff}}^\gamma / (EC_{50}^\gamma + C_{\text{eff}}^\gamma)), \quad (4)$$

where Effect is the processed electroencephalographic measure, the  $E_{\text{max}}$  and  $E_{\text{min}}$  are the maximum and minimum Effect for each individual patient, and  $EC_{50}$  is the sevoflurane concentration at which Effect is midway between this maximum and minimum.  $\gamma$  describes the

slope of the concentration–response relation.  $K_{e0}$  is determined from the iteration yielding the greatest coefficient of determination ( $R^2$ ) for measured and modeled electroencephalographic Effect for each patient.<sup>35</sup> A nonlinear inhibitory sigmoid  $E_{\max}$  curve was fitted to the brain (effect site) concentration–PE or –AE relation. From the fitted curve, values of pharmacodynamic parameters describing this relation were derived, including  $\gamma$  and  $EC_{50}$ . The coefficient  $R^2$  is calculated by

$$R^2 = 1 - \frac{\sum_{i=1}^n (y_i - \hat{y}_i)^2}{\sum_{i=1}^n (y_i - \bar{y})^2}, \quad (5)$$

where  $y_i$  and  $\hat{y}_i$  are PE or AE for a given time and the corresponding model prediction, respectively. The  $\bar{y}$  is the average of all the measurements (PE and AE).

#### Statistical Analysis

The raw electroencephalographic signals were filtered between 3 and 25 Hz and divided into epochs of 10 s duration. For each patient, the PE and AE series were computed and effect site concentrations ( $C_{\text{eff}}$ ) were estimated with pharmacokinetic–pharmacodynamic modeling. The correlations between effect site concentrations and PE and AE were investigated with the model-independent prediction probability ( $P_K$ ) that was described by Smith *et al.*<sup>36</sup> The  $P_K$  value describes the probability that the PE or AE predicts effect site concentration. Considering the decrease of PE and AE with the increase of sevoflurane concentration, the prediction probability ( $P_K$ ) can be calculated by<sup>9</sup>

$$P_K = 1 - ((P_c + P_{\text{tx}}/2)/(P_c + P_d + P_{\text{tx}})), \quad (6)$$

where  $P_c$ ,  $P_d$ , and  $P_{\text{tx}}$  are the respective probabilities that PE or AE values and effect site concentrations are a concordance, a discordance, or an x-only tie. In this study, we randomly selected a pair of PE values from before and after LOC and then determined whether this pair of PE values correctly predicted the trend of effect site concentration (up or down). By repeating the above procedure 300 times, the  $P_c$ ,  $P_d$ , and  $P_{\text{tx}}$  values were estimated, so a  $P_K$  value for each patient could be obtained. The same procedure was used to deal with AE. The details of this procedure can be found in reference 9. A  $P_K$  of 1 for the electroencephalographic parameter (PE or AE) means that the indicators can correctly predict the estimated sevoflurane effect site concentration. Alternatively, a  $P_K$  value of 0.5 means that the electroencephalographic parameters (PE or AE) are no better than chance at predicting the estimated sevoflurane effect site concentration.

The Kolmogorov-Smirnov test was used to determine whether data sets were normally distributed. PE and AE values during the awake state (averaged over a 10-s epoch, 50 s before LOC for all 19 subjects) were compared with values during anesthesia (averaged over a 10-s epoch, 50 s after LOC for all 19 subjects). The PE and AE values at the awake and anesthetized states were analyzed using the nonparametric Wilcoxon test. To determine the changes in PE and AE as anesthesia was deepened, mean PE and AE mean values over 10-s epochs were compared at four time points: awake (50 s before sevoflurane delivery), anesthetic LOC (sevoflurane delivery to LOC), LOC, and LOC + 50 s. The correlation ( $R^2$ ) between the entropy values and the sevoflurane effect site concentration after pharmacokinetic–pharmacodynamic modeling was calculated for each patient, and the average of the correlation was calculated for all 19 patients. This analysis was performed to compare the ability of each algorithm track sevoflurane effect site (brain) concentration. In addition, a relative coefficient of variation (CV) (the ratio of the SD to the mean) was used to determine the predictive performance of the derived entropy estimators PE and AE for sevoflurane effect compartment concentrations.

## Results

Figure 1 shows the time course of measurement for one patient. The electroencephalographic series during deep anesthesia is more regular than at low anesthetic concentrations (see the enlarged sections of electroencephalographic data in fig. 1A). Figure 1B shows that PE and AE of the filtered electroencephalographic epochs decrease with increasing sevoflurane concentration and then reach a plateau after approximately 3 min. It is clear that both PE and AE track the gross changes in electroencephalographic data with increasing anesthetic drug effect (fig. 1B) and end-tidal sevoflurane concentration (fig. 1C).

To evaluate the performance of wavelet filtering to remove artifacts in the electroencephalographic data, the baseline variabilities of PE and AE before anesthetic delivery were estimated by calculating the CV. The CV values of PE and AE before wavelet filtering were  $0.007 \pm 0.008$  and  $0.192 \pm 0.079$  ( $n = 19$ ), respectively. After wavelet filtering, the CV for PE was  $0.004 \pm 0.006$ , compared with  $0.059 \pm 0.047$  for AE ( $n = 19$ ). Clearly, the difference in PE CV values before and after filtering is smaller than the corresponding difference in AE CV values. Assuming the difference of CV values before and after wavelet filtering is derived from the artifacts in the electroencephalographic recordings, these results demonstrated the robustness of the PE algorithm to noise in the electroencephalographic data.

The effect of increasing sevoflurane concentration on AE and PE was quantified by comparing awake and

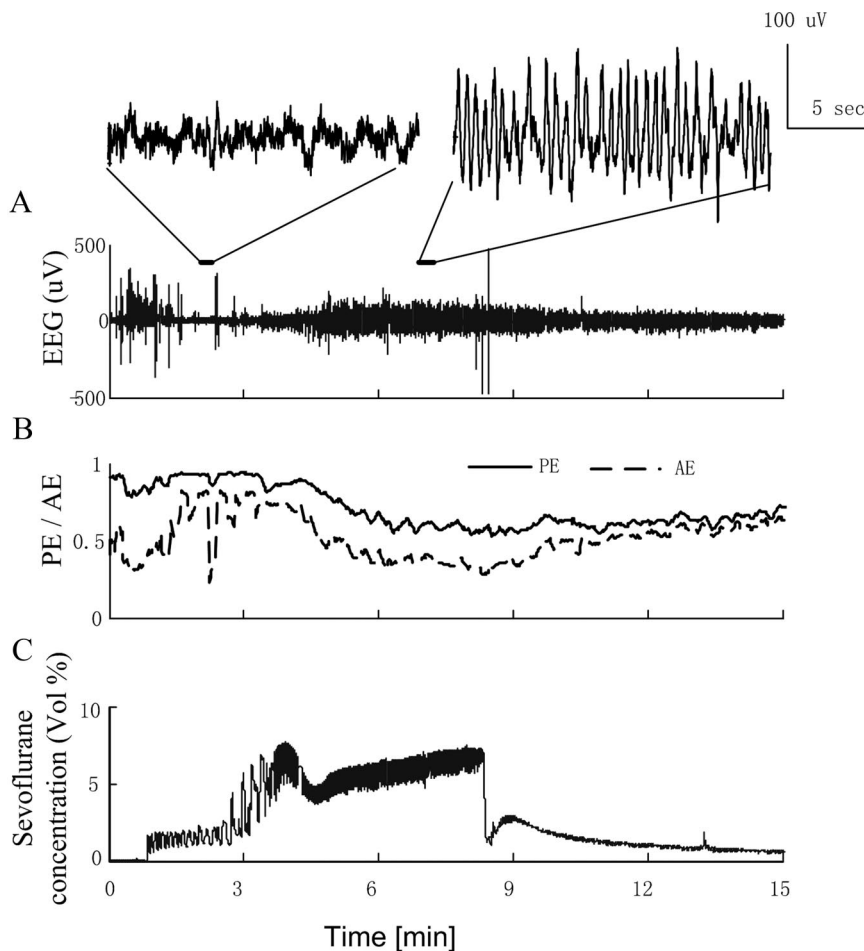

**Fig. 1.** (A) An original electroencephalographic (EEG) recording from one patient. The sample interval is 1/100 s. (B) Time course of permutation entropy (PE) and approximate entropy (AE). The interval is 10 s. (C) End-tidal sevoflurane concentration during the same time course in the same patient.

anesthetized values across all subjects. The median (95% confidence interval) PE values during the awake and anesthetic epochs were 0.90 (0.88–0.91) and 0.66 (0.63–0.73), respectively; the median (95% confidence interval) AE values were 1.24 (1.04–1.33) and 0.80 (0.66–0.87), respectively. The differences in parameter values between awake and anesthetized states were statistically significant for both PE ( $P < 0.0001$ ) and AE ( $P < 0.005$ , Wilcoxon test). The very small 95% confidence limits for PE calculated during the awake electroencephalographic epochs further highlights the resistance of the PE algorithm to electroencephalographic

artifact. To further examine the ability of PE and AE to differentiate awake from anesthetized states, the prediction probability  $P_K$  was calculated. The individual  $P_K$  value for each patient was calculated for the PE and the AE, and the means of  $P_K$  (95% confidence intervals) for PE and AE were 0.86 (0.82–0.89) and 0.79 (0.74–0.83). The difference between parameters was statistically significant ( $P < 0.05$ ).

Plotting PE versus AE (1,425 pairs from all patients) revealed an approximate linear relation between PE and AE, as shown in figure 2, demonstrating the ability of both PE and AE to track gross changes in anesthetic effect. Figure 3 shows the relation between the point of LOC and PE/AE. LOC typically occurred before the rapid decrease in PE and AE ( $0.830 \pm 0.069$  [mean  $\pm$  SD] at LOC for PE, compared with  $1.085 \pm 0.23$  at LOC for AE). The variability in PE at LOC was smaller than for AE, as shown in the above SD values. This suggests that PE may be a more robust indicator of LOC. To compare the changes in PE and AE as anesthesia was deepened, PE and AE values at the awake (10-s epochs), anesthetic LOC, LOC, and anesthetic (after LOC + 50 s, 10-s epochs) states were analyzed for each patient, and a box plot was constructed (fig. 4). The PE values for all patients averaged  $0.935 \pm 0.003$ ,  $0.890 \pm 0.041$ ,  $0.830 \pm$

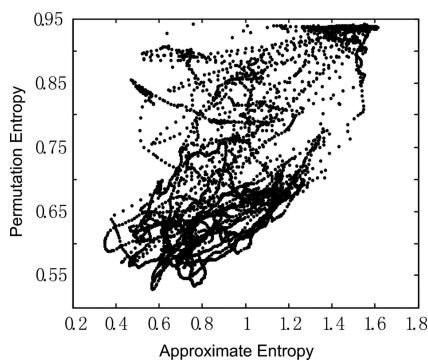

**Fig. 2.** Correlation of the permutation entropy and the approximate entropy ( $r = 0.8$ ,  $P = 0.004$ ) for 19 patients.

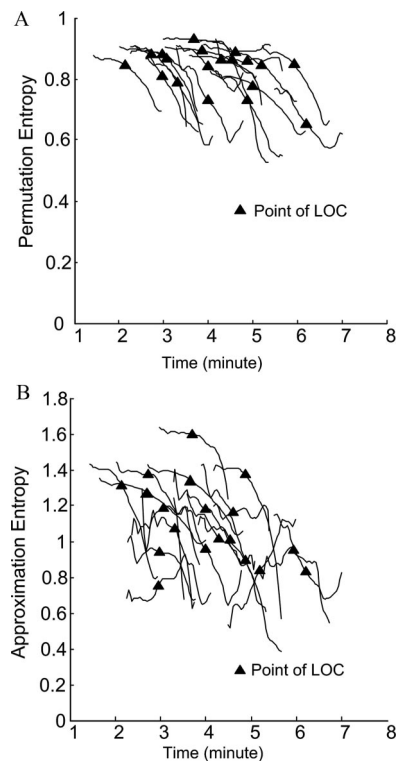

**Fig. 3.** Relation between the point of loss of consciousness (LOC) and permutation entropy/approximate entropy for all subjects. Typically, LOC occurred at slightly lower permutation entropy and approximate entropy compared with awake baseline. (A) Permutation entropy versus LOC; (B) approximate entropy versus LOC.

0.069, and  $0.702 \pm 0.113$  (mean  $\pm$  SD) in the four states, respectively; the corresponding AE values were  $1.502 \pm 0.062$ ,  $1.175 \pm 0.291$ ,  $1.085 \pm 0.230$ , and  $0.785 \pm 0.218$ . The PE and AE values decrease monotonically from the awake to the anesthetized state; however, the root mean squared error of PE linear fitting is 0.029, compared with 0.165 for AE.

The sigmoid dose-response relations between the PE and AE values and the end-tidal sevoflurane concentrations for all subjects are plotted in figure 5. Note that these data do not include any electroencephalographic burst suppression states. The main difference between these plots is the obvious accumulation of values in the region of low AE and low sevoflurane concentration in the AE plot (fig. 5B). This reflects the relative susceptibility of AE to artifacts in the awake state (e.g., blinks and forehead muscle activity) and the resistance of PE to these same artifacts.

Figure 6 shows the data fit for the sevoflurane (effect site) concentration and the PE and AE values for the pharmacokinetic-pharmacodynamic modeling for one patient with an exponential function. Using the pharmacokinetic-pharmacodynamic model, the effect site sevoflurane concentration can be calculated, so the relation between PE and AE values and the effect site sevoflurane concentration can be obtained. Inspection

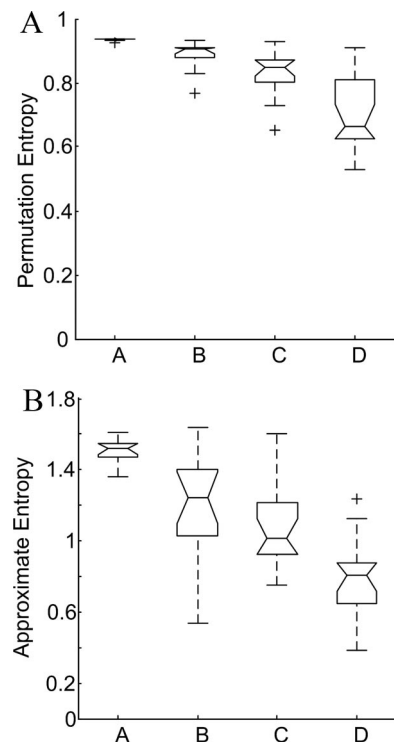

**Fig. 4.** Box plots of the (A) permutation entropy (PE) and (B) approximate entropy (AE) values at the awake (A), anesthetic loss of consciousness (B), loss of consciousness (C), and anesthetic loss of consciousness + 50 s (D) states. The lower and upper lines of the "box" are the 25th and 75th percentiles of the sample, the distance between the top and bottom of the box is the interquartile range, and the line in the middle of the box is the sample median. Outliers (plus sign) are cases with values that are more than 1.5 times the interquartile range. The notches in the box are a graphic confidence interval (95%) about the median of a sample.

of the individual data fits showed that the inhibitory sigmoid  $E_{\max}$  model approximately described the relation between the sevoflurane (effect site) concentration and the PE and AE values. The modeled parameters are listed in table 1, including  $E_{\max}$ ,  $E_{\min}$ ,  $\gamma$ ,  $C_{et}$ ,  $EC_{50}$ ,  $K_{e0}$ , and correlation coefficient  $R^2$ . The parameter values are similar for PE and AE, although the correlation ( $R^2$ ) between the entropy values and the sevoflurane effect site concentration was  $0.89 \pm 0.07$  ( $n = 19$ ) for PE compared with  $0.60 \pm 0.14$  ( $n = 19$ ) for AE. It is worth noting that for the case shown in figure 6, above a sevoflurane concentration of approximately 1.7%, the PE decreases more slowly than indicated by the fitted curve.

## Discussion

In this study, the effect of sevoflurane on brain activity was demonstrated by the PE and AE values of electroencephalographic recordings. The PE and AE values decrease with increasing sevoflurane concentration, and either algorithm could be used to detect gross changes in sevoflurane effect. The variability at baseline, the prediction probability, sensitivity at LOC, the correlation of

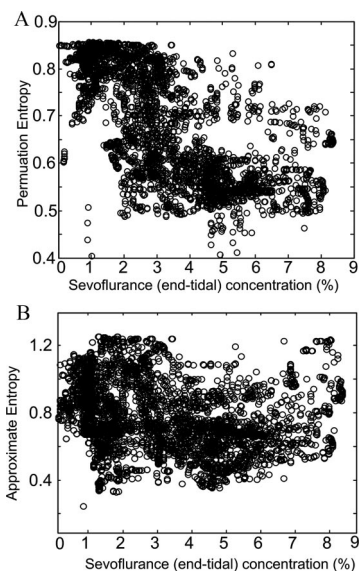

**Fig. 5.** Relation between permutation entropy or approximate entropy and the end-tidal sevoflurane concentration. (A) Sevoflurane concentration *versus* permutation entropy; (B) sevoflurane concentration *versus* approximation entropy.

both parameters and its related measures of anesthetic drug effect on the electroencephalogram (pharmacokinetic–pharmacodynamic) were tested; the statistical analyzes demonstrate several advantages of PE over AE.

First, PE is less sensitive to “artifacts” in the electroencephalographic signal during the awake state. This was reflected in the lower CV for PE and in the higher correlation values for the modeled relation between sevoflurane effect site concentration and PE. Second, PE provides a more robust estimate of the point of LOC. Although both PE and AE could distinguish between the awake and anesthesia states (as shown in fig. 4), the variability of PE at the moment of LOC was smaller than AE, and PE monotonically decreased from awake to LOC. The greater predictive value of PE for differentiating subject state was also reflected in the slightly higher  $P_K$  value for PE compared with AE. Third, the PE is more correlated to the sevoflurane effect site concentration. The correlation ( $R^2$ ) in table 1 shows the PE can accurately reflect the effect of the sevoflurane effect site concentration on brain activity. Finally, PE calculation is simple, fast, and robust. PE calculation simply considers the order relation between the values of a time series instead of the values themselves; the value of PE is based on the distribution of ordinal patterns. Using the method shown in figure 1B to process an electroencephalographic trace of 10 min requires less than 258 s for PE on a P4 1.6-GHz personal computer including wavelet filtering, compared with 372 s for AE. This case analysis shows that the PE method is more readily amenable for use in a real-time electroencephalographic monitor.

Approximate entropy is based on the similarity of events in phase space and is a favorable method to address randomness of a dynamical system. Because AE

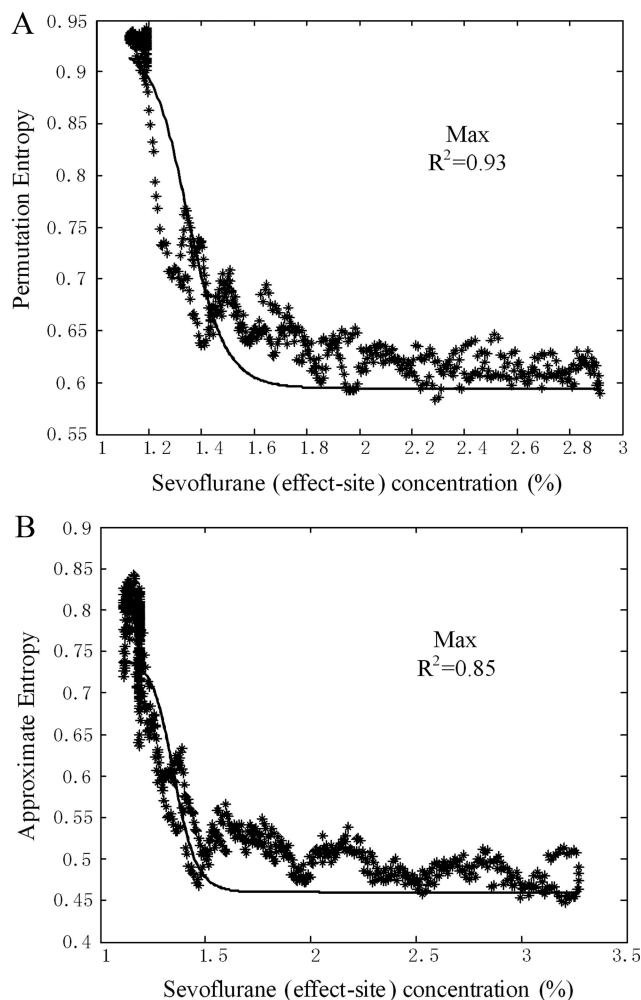

**Fig. 6.** Effect (*vertical axis*) *versus* sevoflurane effect compartment concentration (*horizontal axis*) in the patient with the greatest coefficient of determination  $R^2$  for permutation entropy and approximation entropy. (A) Permutation entropy *versus* effect site sevoflurane concentration; (B) approximation entropy *versus* effect site sevoflurane concentration.

specifies a noise threshold, it may be better than spectral entropy in the quantification of complexity of electroencephalographic recordings.<sup>14,37</sup> The disadvantage of AE is that it is heavily dependent on the record length and is often lower than expected for short records. Another disadvantage is that AE lacks relative consistency.<sup>31</sup> PE is a new statistical parameter that also quantifies the amount of regularity in electroencephalographic data. The first step of PE calculation is to transform an electroencephalographic series into a series of ordinal patterns, which implies that a nonstationary series is transformed to a nearly stationary ordinal series. As a result, PE is less affected by the amplitude of the electroencephalographic data. Furthermore, the PE should be less sensitive to noise embedded in electroencephalographic recordings, which was confirmed by the findings of this study (appendix 2). On the other hand, the correlation coefficient of 0.8 between the PE and AE shows that the PE can be applied to quantify the complexity of electro-

**Table 1. Pharmacokinetic–Pharmacodynamic Parameters for PE and AE**

| Parameter             | PE              | AE              |
|-----------------------|-----------------|-----------------|
| $E_{\max}$            | $0.93 \pm 0.01$ | $1.40 \pm 0.14$ |
| $E_{\min}$            | $0.62 \pm 0.06$ | $0.62 \pm 0.14$ |
| $\gamma$              | $4.51 \pm 4.08$ | $7.79 \pm 7.14$ |
| $EC_{50}$             | $1.24 \pm 0.40$ | $1.73 \pm 0.63$ |
| $t_{1/2}K_{e0}$ , min | $0.84 \pm 0.33$ | $0.54 \pm 0.22$ |
| $R^2$                 | $0.89 \pm 0.07$ | $0.60 \pm 0.14$ |

Data are presented as mean  $\pm$  SD.

AE = approximate entropy;  $EC_{50}$  = concentration that causes 50% of the maximum effect;  $E_{\max}$  = encephalographic parameter value corresponding to maximum drug effect;  $E_{\min}$  = encephalographic parameter value corresponding to minimum drug effect; PE = permutation entropy.

encephalographic signals instead of AE. These factors suggest multiple possible applications of this new tool for the analysis of electroencephalographic data,<sup>33,38</sup> as suggested by case studies successfully separating consciousness from unconsciousness during anesthesia<sup>17</sup> and indicating increases and decreases in anesthetic level.<sup>18</sup>

At surgical levels of anesthesia, some high-frequency artifacts such as electromyographic may interfere with the electroencephalographic PE values. The current data cannot reveal the details on this issue, which should be discussed in future work. From a practical viewpoint, this is a difficult issue because it relates to the identification of artifacts embedded in electroencephalographic series. The PE description of the burst suppression electroencephalographic pattern is another possible problem. With increasing anesthesia concentration, the electroencephalographic waveform changes into a burst suppression pattern, resulting in an increase in PE (fig. 7). Clearly, the AE of burst suppression better reflects very deep anesthesia than PE in this case, although further work is required to draw firm conclusions. The PE method may require a burst suppression ratio component, similar to that used in the BIS monitoring system. The phase relations between the component waves of different frequencies that make up the composite electroencephalogram are considered in the BIS. In fact,

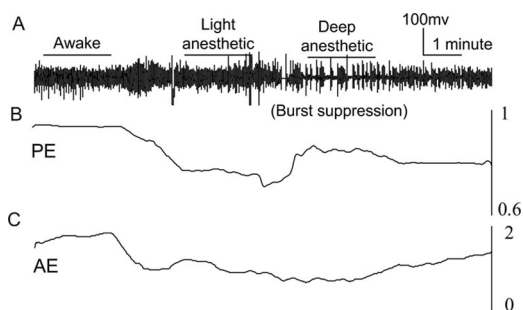

**Fig. 7. Permutation entropy (PE) and approximate entropy (AE) of burst suppression. (A)** An original electroencephalographic recording with a burst suppression pattern. **(B)** PE at the awake, light anesthetic, and deep anesthetic states. PE increases at the duration of burst suppression. **(C)** AE at the awake, light anesthetic, and deep anesthetic states.

the phase information is related to the ordinal pattern in the electroencephalographic data, so the PE is similar to the BIS in this respect. At low concentrations of sevoflurane, such as 1–2%, the PE approximates to the plateau (see the end of figs. 1B and C), which is similar to the BIS.<sup>39</sup> Therefore, PE does not accurately track all levels of anesthesia.

In conclusion, when comparing the performance of PE and AE as measures of anesthetic drug effect on the electroencephalogram, it was found that PE performed better than AE during sevoflurane anesthesia on a number of levels: the baseline variability of PE was lower than that of AE; the prediction probability  $P_K$  was higher than AE; and pharmacokinetic–pharmacodynamic modeling of PE and AE *versus* the sevoflurane (effect site) concentrations revealed that the correlation ( $R^2$ ) between the PE values and the sevoflurane effect site concentrations is higher than AE. These differences largely reflect the resistance of PE to artifact in the electroencephalographic recording. Furthermore, the fast computation of PE ensures that this new measure can be applied to clinical real-time on-line monitoring of anesthetic drug effect. It is suggested that PE may be an excellent candidate for designing a monitor system for depth of anesthesia when integrated with other disparate descriptors of the electroencephalogram.

## Appendix 1: Parameter Selection of Permutation Entropy

The parameter selections of PE should be discussed. The calculation of PE depends on the length of the epoch ( $N$ ) and embedding dimension ( $m$ ),  $m! < N$ . In Bandt and Pompe,<sup>15</sup> the authors recommend  $m = 3, \dots, 7$ . It was found that  $m = 3$  and 4 may still be too small and a value of  $m = 5, 6$ , or 7 seems to be the most suitable for an electroencephalographic series.<sup>16</sup>

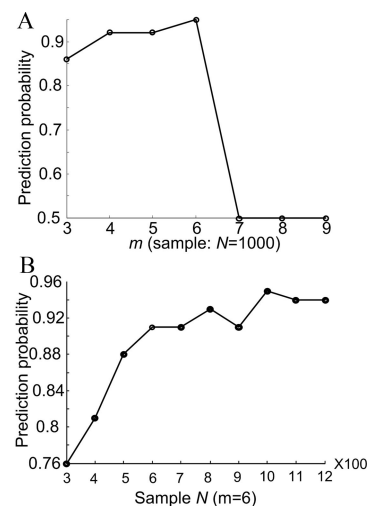

**Fig. 8. Effect of the parameter selection of permutation entropy on the prediction probability  $P_K$  at the awake state. (A)** Relation between the embedded dimension  $m$  and  $P_K$  at the length of 1,000 samples (10 s) of electroencephalographic data. **(B)** Relation between the different length of samples and  $P_K$  at the embedded dimension  $m = 6$ .



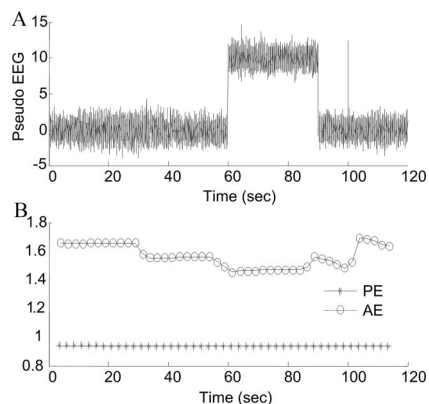

**Fig. 9. Robustness of permutation entropy with a simulation study. (A) Pseudo-electroencephalogram (EEG) (a gaussian process with a sine wave, a square wave, and an impulse). (B) The permutation entropy (PE) and approximate entropy (AE) value of the pseudo-EEG.**

In reference 39, prediction probability ( $P_K$ ) between the AE and effect site concentration was used to assess the parameter selection for AE calculation. A similar approach was used to the parameter selection for PE calculation. Figure 8 shows how varying the embedded dimension  $m$  and length of epoch  $N$  affect the PE calculation at the awake state. Given the embedded dimension  $m = 6$ , the prediction probability ( $P_K$ ) is the biggest when the length of the epoch is 1,000 (10 s) (fig. 8A), because  $7! > 1,000$ , the Somers d statistic is set as zero, so  $P_K = 0.5$  for  $m = 7, 8$ , and 9. Figure 8B shows that the prediction probability ( $P_K$ ) at the embedded dimension  $m = 6$  is the biggest for  $N = 1,000$  ( $N = 300, \dots, 1,200$ ) samples. These results suggest that  $N = 1,000$  and  $m = 6$  are appropriate for PE calculation in this study; the optimal selection could be discussed in the future work.

## Appendix 2: Robustness of Permutation Entropy

To show the robustness of PE, a simulation study was created by following reference 40. Given a gaussian white noise series of 12,000 samples at the sample rate of 100 Hz (mean = 0, SD = 1), the following artifacts were added to generate a pseudo-electroencephalographic series: (1) a sine wave of 2 Hz (similar to eye movement) at the duration of 10–40 s, (2) a square wave at the duration of 60–90 s, and (3) an impulse at 100 s. The same parameters were selected for calculation of PE and AE. As shown in figure 9, the PE holds steady at approximately 0.93, but the AE varies from 1.45 to 1.69. It is clear that the AE is less sensitive to the artifacts.

## References

- Kreuer S, Biedler A, Larsen R, Altmann S, Wilhelm W: Narcotrend monitoring allows faster emergence and a reduction of drug consumption in propofol-remifentanyl anesthesia. *ANESTHESIOLOGY* 2003; 99:34–41
- Yli-Hankala A, Vakkuri A, Annala P, Korttila K: EEG bispectral index monitoring in sevoflurane or propofol anaesthesia: Analysis of direct costs and immediate recovery. *Acta Anaesthesiol Scand* 1999; 43:545–9
- Johansen JW, Sebel PS, Sigl JC: Clinical impact of hypnotic-titration guidelines based on EEG bispectral index (BIS) monitoring during routine anesthetic care. *J Clin Anesth* 2000; 12:433–43
- Heier T, Steen PA: Assessment of anaesthesia depth. *Acta Anaesthesiol Scand* 1996; 40:1087–100
- Rampil IJ, Matteo RS: Changes in EEG spectral edge frequency correlate with the hemodynamic response to laryngoscopy and intubation. *ANESTHESIOLOGY* 1987; 67:139–42
- Sebel PS, Lang E, Rampil IJ, White PF, Cork R, Jopling M, Smith NT, Glass PS, Manberg P: A multicenter study of bispectral electroencephalogram analysis for monitoring anesthetic effect. *Anesth Analg* 1997; 84:891–9
- Rampil IJ: A primer for EEG signal processing in anesthesia. *ANESTHESIOLOGY* 1998; 89:980–1002

- Sigl JC, Chamoun NG: An introduction to bispectral analysis for the electroencephalogram. *J Clin Monit* 1994; 10:392–404
- Ellerkmann RK, Liermann VM, Alves TM, Wenningmann I, Kreuer S, Wilhelm W, Roepcke H, Hoeft A, Bruhn J: Spectral entropy and Bispectral Index as measures of the electroencephalographic effects of sevoflurane. *ANESTHESIOLOGY* 2004; 101:1275–82
- Schneider G, Gelb AW, Schmeller B, Tschakert R, Kochs E: Detection of awareness in surgical patients with EEG-based indices: Bispectral Index and Patient State Index. *Br J Anaesth* 2003; 91:329–35
- Elbert T, Ray WJ, Kowalik ZJ, Skinner JE, Graf KE, Birbaumer N: Chaos and physiology: Deterministic chaos in excitable cell assemblies. *Physiol Rev* 1994; 74:1–47
- Fell J, Röschke J, Mann K, Schäffner C: Discrimination of sleep stages: A comparison between spectral and nonlinear EEG measures. *Electroencephalogr Clin Neurophysiol* 1996; 98:401–10
- Grassberger P, Procaccia I: Estimation of the Kolmogorov entropy from a chaotic signal. *Phys Rev A* 1983; 28:2591–3
- Bruhn J, Röpcke H, Rehberg B, Bouillon T, Hoeft A: Electroencephalogram approximate entropy correctly classifies the occurrence of burst suppression pattern as increasing anesthetic drug effect. *ANESTHESIOLOGY* 2000; 93:981–5
- Bandt C, Pompe B: Permutation entropy: A natural complexity measure for time series. *Phys Rev Lett* 2002; 88:174102
- Cao Y, Tung WW, Gao JB, Protopopescu VA, Hively LM: Detecting dynamical changes in time series using the permutation entropy. *Phys Rev E Stat Nonlin Soft Matter Phys* 2004; 70:046217
- Jordan D, Schneider G, Kochs EF: EEG permutation entropy separates consciousness from unconsciousness during anesthesia (abstract). *ANESTHESIOLOGY* 2006; 105:A1551
- Jordan D, Stockmanns G, Kochs EF, Schneider G: Permutation entropy of the EEG indicates increase and decrease of the anesthetic level (abstract). *ANESTHESIOLOGY* 2007; 106:A800
- McKay ID, Voss LJ, Sleigh JW, Barnard JP, Johannsen EK: Pharmacokinetic-pharmacodynamic modeling the hypnotic effect of sevoflurane using the spectral entropy of the electroencephalogram. *Anesth Analg* 2006; 102:91–7
- Li XL, Sleigh J, Voss L, Ouyang G: Interpretation of anesthetic drug effect using recurrent dynamics of EEG recordings. *Neurosci Lett* 2007; 424:47–50
- Donoho DL: De-noising by soft-thresholding. *IEEE Trans Inform Theory* 1995; 41:613–27
- Li XL, Yao X: Application of fuzzy similarity to prediction of epileptic seizures using EEG signals. *Lect Notes Artif Intell* 2005; 3613:645–52
- Johnstone IM, Silverman BW: Empirical Bayes selection of wavelet thresholds. *Ann Stat* 2005; 33:1700–52
- Antoniadis A, Bigot J, Sapatinas T: Wavelet estimators in nonparametric regression: A comparative simulation study. *J Stat Software* 2001; 6:1–83
- Downie TR, Silverman BW: The discrete multiple wavelet transform and thresholding methods. *IEEE Trans Signal Processing* 1998; 46:2558–61
- Abramovich F, Sapatinas T, Silverman YB: Wavelet thresholding via a bayesian approach. *J R Stat Soc B* 1998; 60:725–49
- Jameson LC, Sloan TB: Using EEG to monitor anesthesia drug effects during surgery. *J Clin Monit and Comput* 2006; 20:445–72
- Jensen EW, Litvan H, Struys M, Martinez Vazquez P: Pitfalls and challenges when assessing the depth of hypnosis during general anaesthesia by clinical signs and electronic indices. *Acta Anaesthesiol Scand* 2004; 48:1260–7
- Pincus SM, Gladstone IM, Ehrenkrantz RA: A regularity statistic for medical data analysis. *J Clin Monit* 1991; 7:335–45
- Inouye T, Shinosaki K, Sakamoto H, Toi S, Ukai S, Iyama A, Katsuda Y, Hirano M: Quantification of EEG irregularity by use of the entropy of the power spectrum. *Electroencephalogr Clin Neurophysiol* 1991; 79:204–10
- Pincus SM: Approximate entropy as a measure of system complexity. *Proc Natl Acad Sci U S A* 1991; 88:2297–301
- Bandt C: Ordinal time series analysis. *Ecological Modelling* 2005; 182:229–38
- Keller K, Lauffer H: Symbolic analysis of high-dimensional time series. *Int J Bifurcation Chaos* 2003; 13:2657–68
- Bandt C, Keller G, Pompe B: Entropy of interval maps via permutations. *Nonlinearity* 2002; 15:1595–602
- Sheiner LB, Stanski DR, Vozeh S, Miller RD, Ham J: Simultaneous modelling of pharmacokinetics and pharmacodynamics: Application to D-tubocurarine. *Clin Pharmacol Ther* 1979; 25:358–71
- Smith WD, Dutton RC, Smith NT: Measuring the performance of anesthetic depth indicators. *ANESTHESIOLOGY* 1996; 84:38–51
- Bruhn J, Röpcke H, Hoeft A: Approximate entropy as an electroencephalographic measure of anesthetic drug effect during desflurane anesthesia. *ANESTHESIOLOGY* 2000; 92:715–26
- Li XL, Ouyang G, Richards D: Predictability analysis of absence seizures with permutation entropy. *Epilepsy Res* 2007; 77:70–4
- Katoh T, Suzuki A, Ikeda K: Electroencephalographic derivatives as a tool for predicting the depth of sedation and anesthesia induced by sevoflurane. *ANESTHESIOLOGY* 1998; 88:642–50
- Sleigh JW, Steyn-Ross DA, Steyn-Ross ML, Grant C, Ludbrook G: Cortical entropy changes with general anaesthesia: Theory and experiment. *Physiol Meas* 2004; 25:921–34
